# Supplementary material
Source: HighWire-hosted journal article supplement (https://www.cmajopen.ca/highwire/filestream/87065/field_highwire_adjunct_files/2/Original_submission.pdf)
Supplement: Original_submission.pdf [file Original_submission.pdf]

**A retrospective cohort study of the prescribing trends of nurse practitioners to older adults in Ontario: 2000 –  
2010**

**Joan E. Tranmer, RN, PHD**

**Professor, School of Nursing and Department of Public Health Sciences, Queen's University**

**Dana S. Edge, RN, PhD**

**Associate Professor, School of Nursing, Queen's University**

**Kim Sears**

**Assistant Professor, School of Nursing, Queen's University**

**Elizabeth VanDenKerkhof, RN, DrPH**

**Professor, School of Nursing and Department of Anaesthesiology and Perioperative Medicine, Queen's University**

**Linda Levesque, BScPharm, PhD**

**Assistant Professor, Department of Public Health Sciences**

**Queen's University**

**Contact author:**

**Joan E. Tranmer**

**School of Nursing**

**92 Barrie Street**

**Queen's University**

**Kingston, Ontario**

**K7L 3N6**

Email: [tranmerj@queensu.ca](mailto:tranmerj@queensu.ca)

**Key words:** primary care, nurse prescribing, nurse practitioner

**Word count:** 2476

## Abstract

**Background:** Nurse prescribing is a health care practice that has, and will continue to evolve in response to emerging trends, particularly in primary care. The overall goal of this study was to describe the trends and patterns in medication prescription to persons  $\geq 65$  years of age in Ontario by nurse practitioners (NPs) over a 10 year period.

**Methods** A population-based descriptive retrospective cohort study was conducted. All NPs registered in the Corporate Provider Database (CPDB), between 1 January 2000 and 31 December 2010, were identified. Active NP prescribers were defined through linkage of dispensed medications to persons  $\geq 65$  years, from the Ontario Drug Benefit (ODB) to NPs. As a comparator, all prescription medications dispensed by family physicians (FPs) to a similar group were identified. Geographical location was determined based on site of NP practice.

**Results:** The number and proportion of actively prescribing NPs increased from 2000 to 2010 [44/340 (12.9%) to 888/1424 (62.4%)]. The number and proportion of medications dispensed for chronic conditions by NPs increased: in 2010, 9 out 10 top medications dispensed were for chronic conditions. There was substantial variation in the proportion of NPs dispensing medication to older persons across LHINs.

**Interpretation:** NP prescribing to older adults, and in particular medications related to chronic conditions, increased between 2000 and 2010. The integration of NPs into primary care has not been consistent across the province, and not in relation to population changes. Further investigation into the nature and effect of NP practice on patient care is warranted.

Word count: 250

## INTRODUCTION

Nurse prescribing is a health care practice that has, and will continue to evolve in response to emerging health system changes and concerns about access, costs and quality. The number of countries in which nurses legally prescribe medication is growing(1;2) and is expected to increase. While the defining criteria for nurse prescribing practices vary, two models are generally described. The first model is the independent nurse prescriber, in which the nurse is responsible for the clinical assessment, diagnosis and medical treatment, within a regulated scope of practice. Independent nurse prescribers can prescribe from a limited formulary containing a list of medications, or from an open formulary, with or without restriction of selected classes of medications, depending on the jurisdiction within which the individual practices. The second model is supplementary nurse prescribing in which the nurse in partnership with an independent prescriber (i.e., physician), after initial assessment and diagnosis, may prescribe medication, usually from a limited formulary.

This study focused on autonomous Nurse Practitioners (NPs). In Ontario, NPs are registered nurses with additional education who collaborate with physicians and other health care providers in the provision of care and are able to assess, order diagnostic tests, diagnose, prescribe medication, and manage patient health conditions within their legal scope of practice.(3) Although various educational programs have existed in Ontario since the 1970's, the *Regulated Health Professions Act* (RHPA, 1991) first paved the way for regulation of the NP role; yet it was not until 1994 that registration as RN-extended class [RN(EC)] occurred.(4-6) The role of the NP in primary practice has evolved in response, predominantly, to the needs of the populations served, and directions established by the provincial ministries.(5;7) Medications prescribed by NPs in Ontario were, historically, outlined in a list of drugs found in Reg.275/94 of the *Nursing Act, 1991*. In 2008, the list was amended to add 24 additional drugs. In December 2009, Bill 179 the *Regulated Health Professions Statute Law Amendment Act* was passed in Ontario

amending 26 health statutes, including both the *Nursing Act, 1991* and the *Regulated Health Professionals Act, 1991*.(8) New authorizations to NP practice include the ability to broadly prescribe medications based on individual NPs' knowledge, competencies and practice setting.(9;10) This specific regulatory change occurred in October 2011 and eliminated the previous allowable list of drugs.(11)

Our knowledge of the patterns and impact of nurse prescribing is limited, but growing.(4;6) Studies examining nurse prescribing tend to be disease-specific(12-16) and employ a variety of non-population-based research designs. Findings from these limited studies generally support nurse prescribing as an effective health care practice; none have explored nurse prescribing practice in Ontario and Canada. Therefore, the objective of this study was to describe NP medication prescribing patterns to persons 65 years of age or older in the province of Ontario across a 10 year period preceding the recent change in prescriptive practice. It is anticipated that findings from this study will provide a baseline and platform for ongoing evaluation of NPs' contribution to primary health care.

## **METHODS**

### **Study design and data sources**

A population-based, retrospective cohort study was conducted to examine the prescribing patterns of NPs providing care to older adults between 2000 and 2010. The study examined four administrative health databases: 1) the Corporate Provider Database (CPDB), which is derived from the list of health professional registered with each respective licensing college, for demographic and practice information on all NPs and physicians with an Ontario Health Insurance Program (OHIP) billing number; 2) the ICES Physician Database (IPDB) to identify family physicians (FPs) and link the physician's encrypted unique identifier to prescriptions dispensed under Ontario's Drug Benefit

(ODB) program; 3) the ODB database for detailed information on all outpatient prescriptions covered by the provincial drug formulary; and 4) the Registered Persons Database (RPDB) for basic demographic information on all residents who have ever received an Ontario health card number (OHCN). These databases are held securely in a linked, de-identified form at the Institute for Clinical Evaluative Sciences (ICES) in Toronto and were analyzed at the ICES satellite unit located at Queen's University,

### **Study cohorts**

All NPs who were registered between 01 January 2000 and 31 December 2010 and had an OHIP billing number in the CPDB database were identified. An NP's eligibility to prescribe in a given year was determined using OHIP eligibility start and end dates, and the Local Health Integration Network (LHIN) where the NP practiced each year was derived using the NP's practice site postal code at the start of each year. To account for the influence of changes in population demographics over time, as well as changes in drug availability, marketing, and formulary coverage during the study period, a cohort of FPs was identified using a similar approach.

### **Prescription medications**

All medications in the ODB database prescribed by a member of the NP or FP cohort and dispensed to patients 65 years of age and older during the study period were identified; the patient's age at dispensation date was obtained through record linkage with the RPDB. As such, only prescriptions with a valid OHCN were included in the analysis. Drugs were categorized on the basis of their pharmacologic and/or therapeutic class, as well as whether they were indicated for an acute (i.e., episodic treatment) or chronic (i.e., chronic treatment) conditions. The categorization of drugs used for both acute and chronic conditions (e.g., nonsteroidal anti-inflammatory drugs [NSAIDs]) was based on the proportion of prescriptions written for a short (<30 days) versus long ( $\geq 30$  days) duration of use. Using this approach, acetaminophen, NSAIDs, proton pump inhibitors (PPIs), and stool softeners were categorized as chronic medications in this older adult population, since the vast majority of prescriptions were  $\geq 30$  days.

## **Analysis**

The NP cohort was described with respect to the number of NPs newly registered each year, age at registration and the proportion who had at least one prescription filled by a patient 65 years and older within their first year of practice (an indicator of 'active' prescribing). To examine geographical variation in the prevalence of NPs prescribing to older adults over time, the number of NPs per 10,000 residents who had at least one prescription filled each year by a patient 65 years of age and older within each of Ontario's 14 LHIN regions was identified. As well, to assess whether changes in the prevalence of prescribing NPs were due to changes in population demographics, the change in the percentage of older adults living within each LHIN during the study period to that of NPs prescribing to older adults within the same LHIN was compared. The proportion of medications prescribed and dispensed each year to older adults for each therapeutic class were identified and ranked according to their frequency of use. All analyses were performed using SAS software version 9.3 (SAS Institute, Inc., Cary, NC).

This study was approved by the Health Services Research Ethics Board at Queen's University.

## **RESULTS**

### **Insert Table 1**

Over the 10 year time period, the number of NPs registered and the proportion who had a prescription dispensed to persons 65 years or older increased (Table 1). In 2000, only 44 of 340 (12.9%) of registered NPs actively prescribed to older adults within their first year of licensure compared to 888 of 1423 (62.4%) eligible NPs in 2010.

### **Insert Table 2 and Figure 1**

In 2000, the highest number of NPs actively prescribing was in the North East Ontario LHIN; the lowest number was in Central and Central West LHIN, and a similar pattern was noted in 2010. However, the number of active NP prescribers increased across the 10 years for all health regions. See Figure 1. The differential increase in the prevalence of actively prescribing NPs across health regions was not solely attributable to an aging population within individual regions as indicated in Table 2. For example, in North East Ontario the percentage increase in seniors across the 10 years was 18.2 %, whereas, the proportion of NPs prescribing to seniors decreased by 15.9%. The Mississauga LHIN had the largest increase in seniors (53.2%) but only a modest increase in the proportion of NPs prescribing (2.5%).

### **Insert Table 3 and Figure 2**

Tables 3 and 4 provide a description of the most common classes of medications prescribed by NPs, in comparison to FP's during the same time period. For NPs, the switch to prescribing medications for more often for chronic compared to acute conditions occurred around 2005; by the following year this trend was well established, with 6 out of the 10 most frequently dispensed medications being those to treat chronic illnesses. The proportion continued to increase to a high of 9 out of the top 10 in 2008 (and sustained thereafter). In contrast, FPs consistently prescribed a higher proportion of medications for chronic conditions throughout the study period. By 2010, 8 of the top 10 most frequently prescribed medications were the same for NPs and FPs. The only differences were that FPs prescribed serotonin inhibitors and benzodiazepines and NPs prescribed laxatives and bisphosphonates; NPs were not regulated to prescribe benzodiazepines during the study period.

## **INTERPRETATION**

### **Key findings**

Within the last decade the number of NPs prescribing medications to older persons in Ontario has increased significantly. The prescribing pattern of NPs has also changed substantially during this time period from prescribing



of medications predominantly for episodic illness (i.e., acute indications) to prescribing of medications for chronic illnesses, a practice that is similar to that of family physicians. While the number of NPs has increased substantially in the province, there continues to exist important differences in the number of practicing NPs across health regions in Ontario, with the northern regions having the highest prevalence of NPs and the central regions having the lowest prevalence per capita. Interestingly, the proportion change of NPs actively prescribing within each LHIN region was not in line with the change in proportion of older persons within the region.

The increase in the actual number of NPs followed logically the introduction of NP educational programs across Canada, specifically the Ontario Primary Health Care Nurse Practitioner Program (PHCNP, a collaboration of nine universities). In 1996, the Ontario PHCNP graduated the first cohort of students; beginning in 2008, new graduate-level curriculum was implemented across the nine university sites. Currently, there are approximately 220 admission seats in Ontario.<sup>(17)</sup> Ongoing primary and community health care reform, such as the introduction of Family Health Teams, has supported the integration of NPs into primary care practices. We were not able to differentiate between primary care and non-primary care NPs, however; the findings are likely reflective of NPs in primary and community care, as most non-primary care nurse practitioners work in the hospital setting where medications are dispensed by hospital pharmacies.

The largest proportion of NPs was in the northern regions of the province, regions supposedly less well served by FPs. The slow uptake of NPs within the central regions of the province is an interesting trend and may reflect the slower uptake of primary health care reform strategies within this region. Currently, of the 200 or so FHTs within the province, 38 are located in the Central West, Mississauga, Toronto Central and Central East Regions – regions with the largest population base. Furthermore, as evident from these findings, the proportional increase (or decrease) of NPs within a region is not aligned with changes in the aging population needs. Of particular concern, is

the increasing number of persons residing in the central region and the limited increase in NP integration and, as well, the decrease in the proportion of NPs per population in the north east region. While we can be reassured that our educational programs are graduating NPs, the integration of NPs into the health care system seems to be driven more by available health system resources and uptake (i.e., FHT and Community Health Centres) rather than by population needs.

NPs prescribing patterns changed across the 10 years and became similar to that of FPs. The shift to prescribing of medications for chronic conditions appears not to be attributable to underlying trends in population demographic as evidenced by the corresponding prescribing trends of FPs. These study findings extend those of other non-population based studies that have explored and compared the prescribing patterns of independent or supplementary role NPs (13;18-20) in comparison to physicians or physician assistants, and clearly show that NPs are prescribing in accordance with their role.

With the growing number of older persons, the increasingly complex medication protocols for disease conditions, the desire to focus care in the primary care setting (and not in hospitals), the goal to optimize the functional health of older persons, and the limited availability of health care resources will challenge primary health care professionals to optimize their respective roles and contributions to care. NPs should be well positioned to contribute to the care of patients with chronic conditions. However, the care of the elderly patient with multiple chronic conditions is complex and challenging (21;22), with risk for medication error that is associated with increasing age, serious health conditions, multiple medications and multiple transfers between community and hospital care(23;24). This will raise some interesting challenges and opportunities for NPs, FPs and the health care teams in which they work. Recent innovative interdisciplinary models of care in which the NP (or nurse) assumes a major role in the care of patients with complex chronic conditions are promising.(25-29) Moreover, funding and

practice models need to support innovation, across traditional health sectors. NPs can assume an important and unique role within the primary health care team, by complementing and augmenting the team approach to elder care.

The strength of this study is its population base and the ability to capture most medications dispensed to older adults in Ontario by NPs with prescribing privileges and FPs across a 10 year time period. This allowed the capture of baseline patterns, before substantial primary health care reform around 2005, and trends across the 10 year time period. More importantly, these data will enable us to ascertain the impact of future health care reform policy, as well as practice changes on prescribing patterns. The data did not include detailed information on patient clinical characteristics or health related outcomes; this will be the focus for further study. As well, there was an inability to determine the practice setting of NPs; this limitation does not influence the interpretation of the results, as we analyzed medications dispensed not prescribed, which predominantly identifies ambulatory or primary care practices

## **CONCLUSIONS**

The study findings clearly demonstrate the growth in numbers of NPs and the number and types of medications dispensed across a 10 year time period. NPs are an integral and important component of the primary health care system and play an important role in the care of persons with chronic conditions. However, the findings also show that, perhaps, NPs are not being optimally positioned in their practice (or within models of care) to best meet the

population needs of the older person. Further research in regard to the impact of NP prescribing on patient and system outcomes is warranted.

**Disclaimer:** The opinions, results and conclusions reported in this paper are those of the authors and are independent from the funding sources. No endorsement by ICES or the Ontario Ministry of Health and Long Term Care (MOHLTC) is intended, nor should be inferred.

**Acknowledgements:** This study was supported by grant from the Senate Advisory Research Council, Queen's University as well as ICES, which is funded by an annual grant from the MOHLTC. We would like to thank Lindsey Colley (Senior Biostatistician, Department of Public Health Sciences, Queen's) for detailed data management and analysis and Peter Gozdyra (ICES) for preparing the spatial map and Brogan Inc., Ottawa for use of their Drug Product and Therapeutic Class Database.

## Reference List

- (1) Kroezen M, van DL, Groenewegen PP, Francke AL. Nurse prescribing of medicines in Western European and Anglo-Saxon countries: a systematic review of the literature. *BMC Health Serv Res* 2011;11:127.
- (2) Kroezen M, Francke AL, Groenewegen PP, van DL. Nurse prescribing of medicines in Western European and Anglo-Saxon countries: a survey on forces, conditions and jurisdictional control. *Int J Nurs Stud* 2012 Aug;49(8):1002-12.
- (3) Canadian Nurses Association (CNA). Canadian nurse practitioner core competency framework. 2010.
- (4) O'Connell E, Creedon R, McCarthy G, Lehane B. An evaluation of nurse prescribing. Part 2: a literature review. *Br J Nurs* 2009 Dec 10;18(22):1398-402.
- (5) Dicenso A, Auffrey L, Bryant-Lukosius D, Donald F, Martin-Misener R, Matthews S, et al. Primary health care nurse practitioners in Canada. *Contemp Nurse* 2007 Aug;26(1):104-15.
- (6) Nurse Practitioner Association of Ontario (NPAO). History of the NP role development in Ontario. 2013.
- (7) Sidani S, Irvine D, Dicenso A. Implementation of the primary care nurse practitioner role in Ontario. *Can J Nurs Leadersh* 2000 Sep;13(3):13-9.
- (8) Legislative Assembly of Ontario (2009 D. *Bill 179, Regulated Health Professions Statute Law Amendment Act, 2009*. 2013.
- (9) Canadian Nurses Association (2010 M. *Canadian nurse practitioner core competency framework*. 2013.
- (10) Colleges of Nurses of Ontario.(2011). *Practice standards: Nurse practitioner*. 2013.
- (11) College of Nurses of Ontario.(2013). *FAQ: Bill 179*. 2013.
- (12) Tsai CL, Sullivan AF, Ginde AA, Camargo CA, Jr. Quality of emergency care provided by physician assistants and nurse practitioners in acute asthma. *Am J Emerg Med* 2010 May;28(4):485-91.

- (13) Ladd E. The use of antibiotics for viral upper respiratory tract infections: an analysis of nurse practitioner and physician prescribing practices in ambulatory care, 1997-2001. *J Am Acad Nurse Pract* 2005 Oct;17(10):416-24.
- (14) Stenner K, Carey N, Courtenay M. Nurse prescribing in dermatology: doctors' and non-prescribing nurses' views. *J Adv Nurs* 2009 Apr;65(4):851-9.
- (15) Davis K, Drennan V. Evaluating nurse prescribing behaviour using constipation as a case study. *Int J Nurs Pract* 2007 Aug;13(4):243-53.
- (16) Creedon R, Weathers E. The impact of nurse prescribing on patients with osteoarthritis. *Br J Community Nurs* 2011 Aug;16(8):393-8.
- (17) Ontario Primary Health Care Nurse Practitioner Program (2013).
- (18) Cipher DJ, Hooker RS, Guerra P. Prescribing trends by nurse practitioners and physician assistants in the United States. *J Am Acad Nurse Pract* 2006 Jun;18(6):291-6.
- (19) Hooker RS, Cipher DJ. Physician assistant and nurse practitioner prescribing: 1997-2002. *J Rural Health* 2005;21(4):355-60.
- (20) Lenz ER, Mundinger MO, Hopkins SC, Lin SX, Smolowitz JL. Diabetes care processes and outcomes in patients treated by nurse practitioners or physicians. *Diabetes Educ* 2002 Jul;28(4):590-8.
- (21) Boyd CM, Darer J, Boult C, Fried LP, Boult L, Wu AW. Clinical practice guidelines and quality of care for older patients with multiple comorbid diseases: implications for pay for performance. *JAMA* 2005 Aug 10;294(6):716-24.
- (22) Upshur RE, Tracy S. Chronicity and complexity: is what's good for the diseases always good for the patients? *Can Fam Physician* 2008 Dec;54(12):1655-8.
- (23) Obreli Neto PR, Nobili A, de Lyra DPJ, Pilger D, Guidoni CM, de Oliveira BA, et al. Incidence and predictors of adverse drug reactions caused by drug-drug interactions in elderly outpatients: a prospective cohort study. *J Pharm Pharm Sci* 2012 Jan;15(2):332-43.
- (24) Koper D, Kamenski G, Flamm M, Bohmdorfer B, Sonnichsen A. Frequency of medication errors in primary care patients with polypharmacy. *Fam Pract* 2012 Nov 6.
- (25) Coleman EA, Grothaus LC, Sandhu N, Wagner EH. Chronic care clinics: a randomized controlled trial of a new model of primary care for frail older adults. *J Am Geriatr Soc* 1999 Jul;47(7):775-83.
- (26) Lenaghan E, Holland R, Brooks A. Home-based medication review in a high risk elderly population in primary care--the POLYMED randomised controlled trial. *Age Ageing* 2007 May;36(3):292-7.

- (27) Muntinga ME, Hoogendijk EO, van Leeuwen KM, van Hout HP, Twisk JW, van der Horst HE, et al. Implementing the chronic care model for frail older adults in the Netherlands: study protocol of ACT (frail older adults: care in transition). *BMC Geriatr* 2012;12:19.
- (28) Tracy CS, Bell SH, Nickell LA, Charles J, Upshur RE. The IMPACT clinic: Innovative model of interprofessional primary care for elderly patients with complex health care needs. *Can Fam Physician* 2013 Mar;59(3):e148-e155.
- (29) Boult C, Reider L, Leff B, Frick KD, Boyd CM, Wolff JL, et al. The effect of guided care teams on the use of health services: results from a cluster-randomized controlled trial. *Arch Intern Med* 2011 Mar 14;171(5):460-6.

Table 1: Characteristics of Nurse Practitioners registered in Ontario between 2000 and 2010

| <i>Year</i> | <i>Number newly registered</i> | <i>Mean age at registration (SD)</i> | <i>Age range (yrs)</i> | <i>Total number registered</i> | <i>Number with ≥1 prescription dispensed to persons ≥65 years</i> |
|-------------|--------------------------------|--------------------------------------|------------------------|--------------------------------|-------------------------------------------------------------------|
| 2000        | 65                             | 40.3 (6.5)                           | 26-58                  | 340                            | 44 (12.9%)                                                        |
| 2001        | 50                             | 40.9 (7.6)                           | 27-60                  | 389                            | 71 (18.3%)                                                        |
| 2002        | 40                             | 41.1 (7.0)                           | 27-55                  | 429                            | 79 (18.4%)                                                        |
| 2003        | 87                             | 40.7 (7.4)                           | 27-56                  | 516                            | 89 (17.2%)                                                        |

|      |     |            |       |      |             |
|------|-----|------------|-------|------|-------------|
| 2004 | 56  | 41.0 (7.6) | 28-59 | 572  | 119 (20.8%) |
| 2005 | 55  | 39.9 (7.8) | 27-55 | 627  | 192 (30.6%) |
| 2006 | 75  | 39.0 (8.0) | 26-57 | 702  | 275 (39.2%) |
| 2007 | 162 | 40.0 (9.0) | 26-64 | 863  | 399 (46.2%) |
| 2008 | 156 | 39.6 (8.3) | 25-59 | 1019 | 536 (52.6%) |
| 2009 | 234 | 40.0 (8.8) | 25-63 | 1252 | 694 (55.4%) |
| 2010 | 171 | 38.6 (9.4) | 26-61 | 1423 | 888 (62.4%) |



Figure 1: Prevalence of Nurse Practitioners actively prescribing in 2000, 2005 and 2010 according to the Local Health Integration Network (LHIN) of their practice site

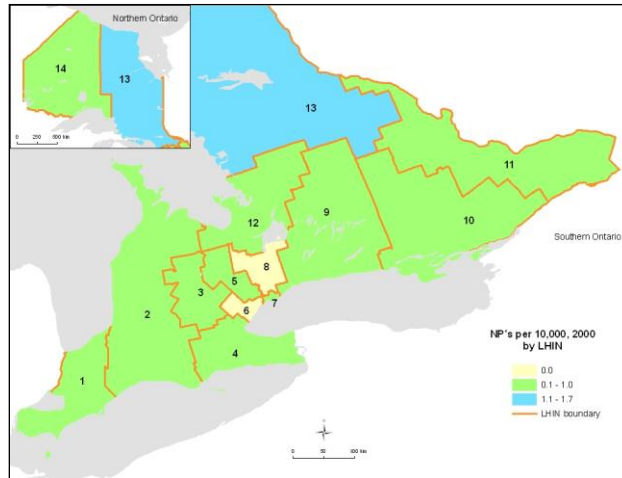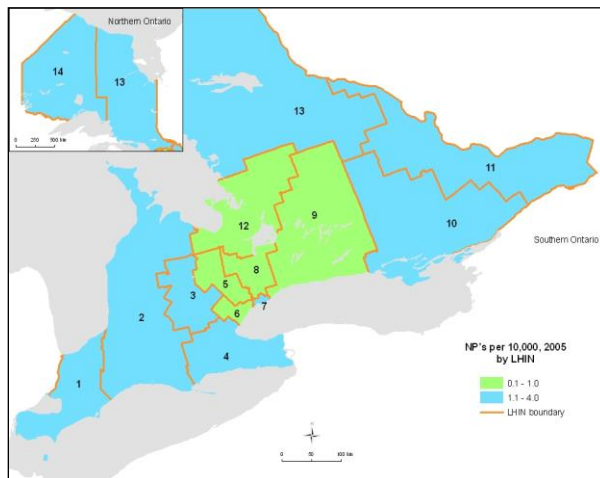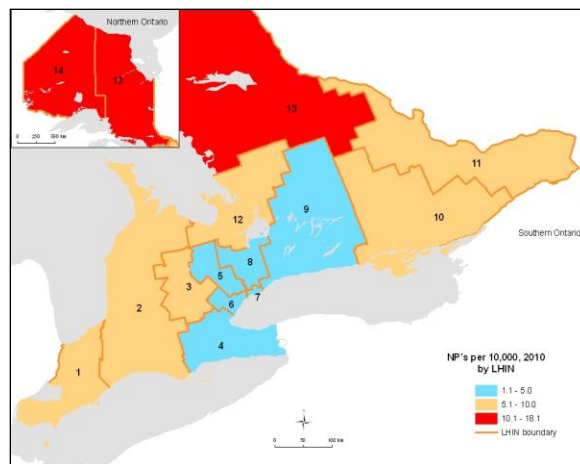

Table 2: Comparison of changes in the proportion of older persons and the prevalence of Nurse Practitioners prescribing to older adults between 2000 and 2010 by local health integration network (LHIN)

| <i>Local health integration network (LHIN)</i> | <i>Change in the proportion of older persons (%)</i> | <i>Change in the prevalence of NPs prescribing to older persons (%)</i> |
|------------------------------------------------|------------------------------------------------------|-------------------------------------------------------------------------|
| <i>Erie St. Clair</i>                          | 13.9                                                 | -0.8                                                                    |
| <i>South West</i>                              | 17.3                                                 | 1.0                                                                     |
| <i>Waterloo Wellington</i>                     | 26.4                                                 | 5.2                                                                     |
| <i>Hamilton Niagara Haldimand Brant</i>        | 19.3                                                 | -0.7                                                                    |
| <i>Central West</i>                            | 41.2                                                 | -2.7                                                                    |
| <i>Mississauga Halton</i>                      | 53.2                                                 | 2.5                                                                     |
| <i>Toronto Central</i>                         | 6.3                                                  | -5.6                                                                    |
| <i>Central</i>                                 | 37.0                                                 | 2.6                                                                     |
| <i>Central East</i>                            | 20.1                                                 | 3.2                                                                     |
| <i>South East</i>                              | 22.0                                                 | 3.4                                                                     |
| <i>Champlain</i>                               | 21.7                                                 | 1.4                                                                     |
| <i>North Simcoe Muskoka</i>                    | 41.5                                                 | 3.9                                                                     |
| <i>North East</i>                              | 18.2                                                 | -15.9                                                                   |
| <i>North West</i>                              | 5.9                                                  | 4.6                                                                     |

Figure 2: Comparison of the prescribing trends of NPs and GPs of medications for acute and chronic indications

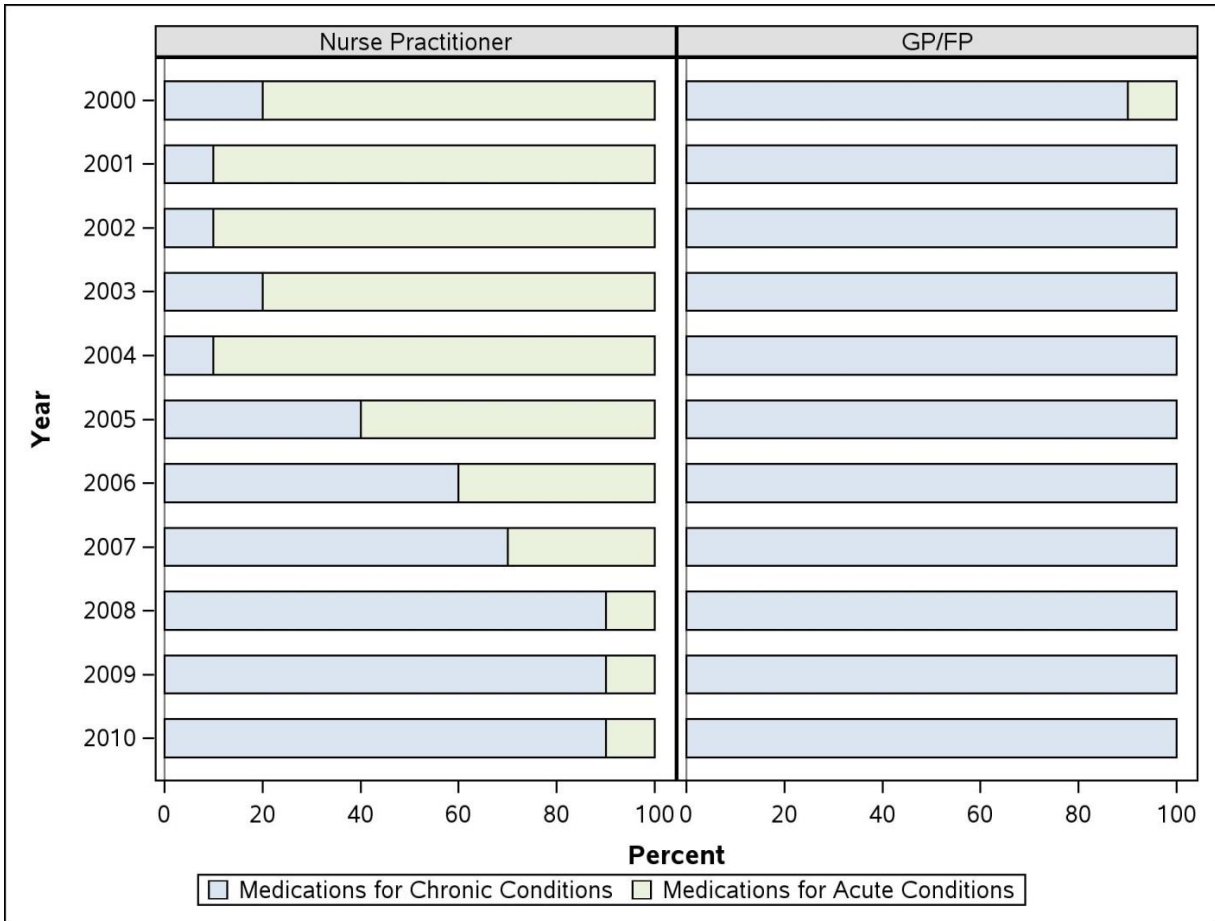

Table 3: Top 10 medications dispensed to persons 65 and older by NPs and GPs in 2000, 2005 and 2010.

| Rank                                             | 2000                                       |                                            | 2005                                      |                                                      | 2010                                |                                                      |
|--------------------------------------------------|--------------------------------------------|--------------------------------------------|-------------------------------------------|------------------------------------------------------|-------------------------------------|------------------------------------------------------|
|                                                  | NP                                         | GP                                         | NP                                        | GP                                                   | NP                                  | GP                                                   |
| 1                                                | Sulf/tmp<br>(22.8%)                        | ACEI<br>(6.1%)                             | Fungicides<br>(9.6%)                      | Diuretics<br>(6.7%)                                  | Statins<br>(9.2%)                   | Statins<br>(7.4%)                                    |
| 2                                                | Penicillins (12.3%)                        | Benzodiazepine<br>derivatives (6.0%)       | Non-systemic<br>corticosteroids<br>(7.7%) | ACEI<br>(6.5%)                                       | ACEI<br>(6.5%)                      | PPI<br>(5.6%)                                        |
| 3                                                | Non-systemic<br>corticosteroids<br>(11.1%) | Diuretics<br>(5.5%)                        | Laxatives<br>(6.8%)                       | Statins<br>(5.9%)                                    | Diuretics<br>(6.4%)                 | Diuretics<br>(5.6%)                                  |
| 4                                                | NSAID<br>(7.7%)                            | CCB<br>(4.9%)                              | Diuretics<br>(5.1%)                       | CCB<br>(4.9%)                                        | PPI<br>(5.2%)                       | ACEI<br>(5.2%)                                       |
| 5                                                | Fungicides<br>(7.1%)                       | BB<br>(4.0%)                               | Misc local anti-<br>infectives<br>(5.1%)  | BB<br>(4.8%)                                         | BB<br>(4.8%)                        | CCB<br>(4.7%)                                        |
| 6                                                | Antibiotics<br>(5.5%)                      | Statins<br>(3.8%)                          | Macrolides<br>(5.0%)                      | PPI<br>(4.4%)                                        | CCB<br>(4.7%)                       | BB<br>(4.7%)                                         |
| 7                                                | Urinary anti-<br>infectives<br>(5.2%)      | NSAID<br>(3.7%)                            | Analgesics simple<br>(3.8%)               | Benzodiazepine<br>derivatives (4.2%)                 | OHA<br>(4.6%)                       | OHA<br>(4.2%)                                        |
| 8                                                | Laxatives<br>(4.0%)                        | OHA<br>(3.6%)                              | ACEI<br>(3.8%)                            | OHA<br>(3.9%)                                        | Hypothyroidism<br>therapy<br>(3.4%) | Hypothyroidism<br>therapy<br>(3.2%)                  |
| 9                                                | Analgesics simple<br>(3.4%)                | Histamine h2 receptor<br>antagonist (3.5%) | Sulf/tmp<br>(3.7%)                        | Hypothyroidism<br>therapy<br>(3.3%)                  | Laxatives<br>(3.0%)                 | Selective serotonin<br>reuptake inhibitors<br>(3.1%) |
| 10                                               | Metronidazole<br>(3.1%)                    | Narcotics: opiate<br>agonists (3.3%)       | Stool softeners<br>(3.5%)                 | Selective serotonin<br>reuptake inhibitors<br>(2.9%) | Bisphosphonates<br>(3.0%)           | Benzodiazepine<br>derivatives (3.0%)                 |
| Percentage of all<br>medication<br>prescriptions | 82%                                        | 45%                                        | 54%                                       | 48%                                                  | 51%                                 | 47%                                                  |

 Medications for chronic conditions

 Medications for acute conditions

OHA= Oral anti-glycemics; BB= Beta-blockers; PPI= Proton pump inhibitors; CCB= Calcium blockers; Sulf/tmp= Sulfonamides, trimetroprim and combination; NSAID= Non-steroidal anti-inflammatory: non-asa base; Statins= Antilipemic: statins; ACEI= ACE Inhibitors; Misc local anti-infectives= Miscellaneous local anti-infectives; Analgesics and antipyretics: misc= Analgesics and antipyretics: miscellaneous
